# Supplementary material for: Resources Required for Implementation of SARS-CoV-2 Screening in Massachusetts K-12 Public Schools in Winter/Spring 2021
Source: bioRxiv or medRxiv preprint supplement (doi:10.1101/2021.12.10.21267568), 2021-12-13
Supplement: Supplementary file [file media-2.pdf]

Appendix B: Costing Calculations

|   | Total personnel reported | Total hours reported | Role                           | Assumed number of people in each role (sum to B) | Relative weight (sum to 1) | Weighted # hours for each role (sum to C) | Hourly wage for each role | Weekly cost for each role | Per-person assay cost (students) | Total weekly personnel cost | # screened per week (students) | Total assay + personnel weekly cost |
|---|--------------------------|----------------------|--------------------------------|--------------------------------------------------|----------------------------|-------------------------------------------|---------------------------|---------------------------|----------------------------------|-----------------------------|--------------------------------|-------------------------------------|
| 1 | 18                       | 13                   | School nurses at each school   | 8.5                                              | 0.47                       | 6.14                                      | \$66.84                   | \$410                     |                                  |                             |                                |                                     |
|   | 18                       | 13                   | School nurses at each district | 8.5                                              | 0.47                       | 6.14                                      | \$66.84                   | \$410                     |                                  |                             |                                |                                     |
|   | 18                       | 13                   | Paid project managers          | 1                                                | 0.06                       | 0.72                                      | \$42.52                   | \$31                      | \$5.00                           | <b>\$851</b>                | 101.00                         | \$1,356.36                          |
| 2 | 13                       | 23                   | School nurses at each school   | 3.666667                                         | 0.28                       | 6.49                                      | \$66.84                   | \$434                     |                                  |                             |                                |                                     |
|   | 13                       | 23                   | School nurses at each district | 3.666667                                         | 0.28                       | 6.49                                      | \$58.42                   | \$379                     |                                  |                             |                                |                                     |
|   | 13                       | 23                   | Paid project managers          | 1                                                | 0.08                       | 1.77                                      | \$42.52                   | \$75                      |                                  |                             |                                |                                     |
|   | 13                       | 23                   | District HHS department        | 1                                                | 0.08                       | 1.77                                      | \$22.26                   | \$39                      |                                  |                             |                                |                                     |
|   | 13                       | 23                   | Educators/school staff         | 3.666667                                         | 0.28                       | 6.49                                      | \$58.42                   | \$379                     | \$5.00                           | <b>\$1,306</b>              | 28.00                          | \$1,446.22                          |
| 3 | 3                        | 100                  | School nurses at each school   | 0.6                                              | 0.20                       | 20.00                                     | \$66.84                   | \$1,337                   |                                  |                             |                                |                                     |
|   | 3                        | 100                  | School nurses at each district | 0.6                                              | 0.20                       | 20.00                                     | \$66.84                   | \$1,337                   |                                  |                             |                                |                                     |
|   | 3                        | 100                  | Educators/school staff         | 0.6                                              | 0.20                       | 20.00                                     | \$58.42                   | \$1,168                   |                                  |                             |                                |                                     |
|   | 3                        | 100                  | Parent volunteer               | 0.6                                              | 0.20                       | 20.00                                     | \$25.75                   | \$515                     |                                  |                             |                                |                                     |
|   | 3                        | 100                  | Other                          | 0.6                                              | 0.20                       | 20.00                                     | \$31.93                   | \$639                     | \$5.00                           | <b>\$4,996</b>              | 624.00                         | \$8,115.68                          |
| 4 | 18                       | 18                   | School nurses at each school   | 4.50                                             | 0.25                       | 4.50                                      | \$66.84                   | \$301                     |                                  |                             |                                |                                     |
|   | 18                       | 18                   | School nurses at each district | 4.50                                             | 0.25                       | 4.50                                      | \$66.84                   | \$301                     |                                  |                             |                                |                                     |
|   | 18                       | 18                   | Educators/school staff         | 4.50                                             | 0.25                       | 4.50                                      | \$58.42                   | \$263                     |                                  |                             |                                |                                     |

|    |    |     |                                |       |      |       |         |         |         |                |         |             |
|----|----|-----|--------------------------------|-------|------|-------|---------|---------|---------|----------------|---------|-------------|
|    | 18 | 18  | Other                          | 4.50  | 0.25 | 4.50  | \$31.93 | \$144   | \$15.00 | <b>\$1,008</b> | 1295.00 | \$20,433.15 |
| 5  | 8  | 18  | School nurses at each school   | 7.5   | 0.94 | 16.88 | \$66.84 | \$1,128 | \$10.00 | <b>\$1,128</b> | 874.00  | \$9,867.93  |
| 6  | 23 | 38  | District HHS department        | 1     | 0.04 | 1.65  | \$22.26 | \$37    |         |                |         |             |
|    | 23 | 38  | Superintendent                 | 1     | 0.04 | 1.65  | \$75.29 | \$124   |         |                |         |             |
|    | 23 | 38  | School nurses at each school   | 12    | 0.52 | 19.83 | \$66.84 | \$1,325 |         |                |         |             |
|    | 23 | 38  | Volunteer project managers     | 3     | 0.13 | 4.96  | \$42.52 | \$211   |         |                |         |             |
|    | 23 | 38  | Other                          | 3     | 0.13 | 4.96  | \$31.93 | \$158   | \$25.00 | <b>\$1,855</b> | 770.00  | \$21,105.37 |
| 7  | 3  | 100 | School nurses at each school   | 1.00  | 0.33 | 33.33 | \$66.84 | \$2,228 |         |                |         |             |
|    | 3  | 100 | Educators/school staff         | 1.00  | 0.33 | 33.33 | \$58.42 | \$1,947 |         |                |         |             |
|    | 3  | 100 | Other                          | 1.00  | 0.33 | 33.33 | \$31.93 | \$1,064 | \$5.00  | <b>\$5,240</b> | 344.00  | \$6,959.80  |
| 8  | 13 | 100 | School nurses at each school   | 6.00  | 0.46 | 46.15 | \$66.84 | \$3,085 |         |                |         |             |
|    | 13 | 100 | Paid project managers          | 1.00  | 0.08 | 7.69  | \$42.52 | \$327   |         |                |         |             |
|    | 13 | 100 | Town or city staff             | 6.00  | 0.46 | 46.15 | \$21.27 | \$982   | \$5.00  | <b>\$4,394</b> | 772.00  | \$8,253.71  |
| 9  | 38 | 23  | School nurses at each school   | 9.25  | 0.24 | 5.60  | \$66.84 | \$374   |         |                |         |             |
|    | 38 | 23  | School nurses at each district | 9.25  | 0.24 | 5.60  | \$66.84 | \$374   |         |                |         |             |
|    | 38 | 23  | Paid project managers          | 1.00  | 0.03 | 0.61  | \$42.52 | \$26    |         |                |         |             |
|    | 38 | 23  | Town or city staff             | 9.25  | 0.24 | 5.60  | \$21.27 | \$119   |         |                |         |             |
|    | 38 | 23  | Educators/school staff         | 9.25  | 0.24 | 5.60  | \$58.42 | \$327   | \$20.00 | <b>\$1,220</b> | 747.00  | \$16,160.35 |
| 10 | 38 | 100 | School nurses at each school   | 12.67 | 0.33 | 33.33 | \$66.84 | \$2,228 |         |                |         |             |
|    | 38 | 100 | School nurses at each district | 12.67 | 0.33 | 33.33 | \$66.84 | \$2,228 |         |                |         |             |
|    | 38 | 100 | Educators/school staff         | 12.67 | 0.33 | 33.33 | \$58.42 | \$1,947 | \$15.00 | <b>\$6,403</b> | 2557.00 | \$44,758.47 |

|    |     |     |                                             |       |      |       |         |            |         |                   |         |             |
|----|-----|-----|---------------------------------------------|-------|------|-------|---------|------------|---------|-------------------|---------|-------------|
| 11 | 18  | 100 | School nurses at each school                | 5.67  | 0.31 | 31.48 | \$66.84 | \$2,104    |         |                   |         |             |
|    | 18  | 100 | School nurses at each district              | 5.67  | 0.31 | 31.48 | \$66.84 | \$2,104    |         |                   |         |             |
|    | 18  | 100 | District physician or medical advisory team | 1.00  | 0.06 | 5.56  | \$78.69 | \$437      |         |                   |         |             |
|    | 18  | 100 | Town or city staff                          | 5.67  | 0.31 | 31.48 | \$21.27 | \$670      | \$5.00  | <b>\$5,315</b>    | 1575.00 | \$13,190.24 |
| 12 | 8   | 38  | School nurses at each school                | 2.67  | 0.33 | 12.67 | \$66.84 | \$847      |         |                   |         |             |
|    | 8   | 38  | School nurses at each district              | 2.67  | 0.33 | 12.67 | \$66.84 | \$847      |         |                   |         |             |
|    | 8   | 38  | Educators/school staff                      | 2.67  | 0.33 | 12.67 | \$58.42 | \$740      | \$5.00  | <b>\$2,433</b>    | 553.00  | \$5,198.32  |
| 13 | 100 | 8   | School nurses at each school                | 50.00 | 2.00 | 16.00 | \$66.84 | \$1,069    |         |                   |         |             |
|    | 100 | 8   | Educators/school staff                      | 50.00 | 2.00 | 16.00 | \$58.42 | \$935      | \$5.00  | <b>\$2,004</b>    | 775.00  | \$5,879.22  |
| 14 | 8   | 38  | School nurses at each school                | 3.50  | 0.44 | 16.63 | \$66.84 | \$1,111    |         |                   |         |             |
|    | 8   | 38  | School nurses at each district              | 3.50  | 0.44 | 16.63 | \$66.84 | \$1,111    |         |                   |         |             |
|    | 8   | 38  | Paid project managers                       | 2.00  | 0.25 | 9.50  | \$42.52 | \$404      | \$11.00 | <b>\$2,626</b>    | 1400.00 | \$18,026.38 |
| 15 | 3   | 38  | School nurses at each school                | 2.5   | 0.83 | 58.42 | \$66.84 | \$3,905.03 | 6       | <b>\$3,905.03</b> | 185.00  | \$5,015.03  |
| 16 | 13  | 38  | School nurses at each school                | 4.33  | 0.33 | 12.67 | \$66.84 | \$847      |         |                   |         |             |
|    | 13  | 38  | School nurses at each district              | 4.33  | 0.33 | 12.67 | \$66.84 | \$847      |         |                   |         |             |
|    | 13  | 38  | Paid project managers                       | 4.33  | 0.33 | 12.67 | \$42.52 | \$539      | \$15.00 | <b>\$2,232</b>    | 1056.00 | \$18,071.87 |
| 17 | 8   | 8   | School nurses at each district              | 4.00  | 0.50 | 4.00  | \$66.84 | \$267      |         |                   |         |             |
|    | 8   | 8   | Parent volunteer                            | 4.00  | 0.50 | 4.00  | \$25.75 | \$103      | \$5.00  | <b>\$370</b>      | 750.00  | \$4,120.36  |
| 18 | 23  | 23  | School nurses at each school                | 7.67  | 0.33 | 7.67  | \$66.84 | \$512      |         |                   |         |             |

|    |    |     |                                             |       |      |       |         |            |         |                   |         |             |
|----|----|-----|---------------------------------------------|-------|------|-------|---------|------------|---------|-------------------|---------|-------------|
|    | 23 | 23  | School nurses at each district              | 7.67  | 0.33 | 7.67  | \$66.84 | \$512      |         |                   |         |             |
|    | 23 | 23  | Educators/school staff                      | 7.67  | 0.33 | 7.67  | \$58.42 | \$448      | \$12.00 | <b>\$1,473</b>    | 1083.00 | \$14,468.80 |
| 19 | 8  | 38  | District HHS Department                     | 1     | 0.13 | 4.75  | \$22.26 | \$105.74   |         |                   |         |             |
|    | 8  | 38  | School nurses at each school                | 6     | 0.75 | 28.5  | \$66.84 | \$1,904.94 |         |                   |         |             |
|    | 8  | 38  | District physician or medical advisory team | 1     | 0.13 | 4.75  | \$78.69 | \$373.78   | 6       | <b>\$2,384.45</b> | 913     | \$7862.45   |
| 20 | 38 | 100 | School nurses at each school                | 7.00  | 0.18 | 18.42 | \$66.84 | \$1,231    |         |                   |         |             |
|    | 38 | 100 | School nurses at each district              | 7.00  | 0.18 | 18.42 | \$66.84 | \$1,231    |         |                   |         |             |
|    | 38 | 100 | Superintendent                              | 1.00  | 0.03 | 2.63  | \$75.29 | \$198      |         |                   |         |             |
|    | 38 | 100 | Other                                       | 22.00 | 0.58 | 57.89 | \$31.93 | \$1,849    | \$13.50 | <b>\$4,509</b>    | 1190.00 | \$20,574.25 |
| 21 | 18 | 38  | School nurses at each school                | 5.83  | 0.32 | 12.31 | \$66.84 | \$823      |         |                   |         |             |
|    | 18 | 38  | School nurses at each district              | 5.83  | 0.32 | 12.31 | \$66.84 | \$823      |         |                   |         |             |
|    | 18 | 38  | Educators/school staff                      | 5.83  | 0.32 | 12.31 | \$58.42 | \$719      | \$13.81 | <b>\$2,364</b>    | 2907.00 | \$42,510.05 |
